# Supplementary material for: Shedding light on 19th century spectra by analyzing Lippmann photography
Source: PubMed Central journal article supplement — Proc Natl Acad Sci U S A. 2021 Apr 15;118(17):e2008819118. doi: 10.1073/pnas.2008819118 (PMC8092472; doi:10.1073/pnas.2008819118), 2021-04-15
Supplement: pnas.2008819118.sapp.pdf [file pnas.2008819118.sapp.pdf]

## **Supplementary Information for**

### **Shedding light on 19th century spectra by analyzing Lippmann photography**

**Gilles Baechler, Arnaud, Latty, Michaline Pacholska, Martin Vetterli, Adam Scholefield**

**Corresponding Author: Gilles Baechler.**  
**E-mail: [gilles.baechler@gmail.com](mailto:gilles.baechler@gmail.com)**

#### **This PDF file includes:**

Supplementary text  
Fig. S1 (not allowed for Brief Reports)  
Legends for Movies S1 to S2

#### **Other supplementary materials for this manuscript include the following:**

Movies S1 to S2

## Supporting Information Text

### 1. Making Lippmann plates

Below is the procedure we followed to make our own Lippmann plates.

#### A. Holographic plates.

- Get Ultimate Holography U08C Lippmann (0 color preshift).
- Harden plates by putting them in oven at 50° C for at least 2 hours no more than 2 weeks before using them.

#### B. Developing and fixing solutions.

- Developer: solution of pyrogallol in ethanol at 10 g/l.
- Restrainer: solution of potassium bromide in demineralized water at 100 g/l.
- Accelerator: solution of ammonia in demineralized water at 25%.
- Fixer: solution of sodium thiosulfate in demineralized water at 100 g/l (dissolution is slow).

#### C. Plate exposure.

- Emulsion side must be behind (hint: fog will form only on glass side when blowing on plate).
- Sensitivity is  $\sim 1$  mISO.

#### D. Development.

- Mix the developing solution in a tray (recipe for a 4"  $\times$  5" plate, otherwise scale appropriately):
  - 50 ml of water.
  - 5 ml of developer.
  - 5 ml of restrainer (may be added only during the process for more control).
  - 2 drops of accelerator (add just before development).
- Get in a dark room with very faint light (reasonably stronger light might be used shortly to check the development state by transparency).
- Immerse the plate in the developing solution (emulsion upside) for  $\sim 2$  min (time depending on exposure and temperature, determined by experience so as to have bright rendition and limited saturation) while gently shaking.
- Immediately rinse the plate under running water for  $\sim 1$  min.
- Do not reuse the bath.

#### E. Fixing.

- Immerse the plate for  $\sim 20$  sec in the fixing solution within a few days of normal indoor light exposure after development (the bath can be reused for many plates).
- Immediately rinse the plate under running water for  $\sim 20$  min.
- Note that fixing also shrinks emulsion.

#### F. Correcting a plate for blue shift (optional, by expanding emulsion).

- Put the plate in a solution of sorbitol in demineralized water at  $\sim 100$  g/l.
- Increase or decrease the concentration of sorbitol of the bath until obtaining acceptable colors.
- Dry the plate as uniformly as possible (avoid heterogeneous concentration).

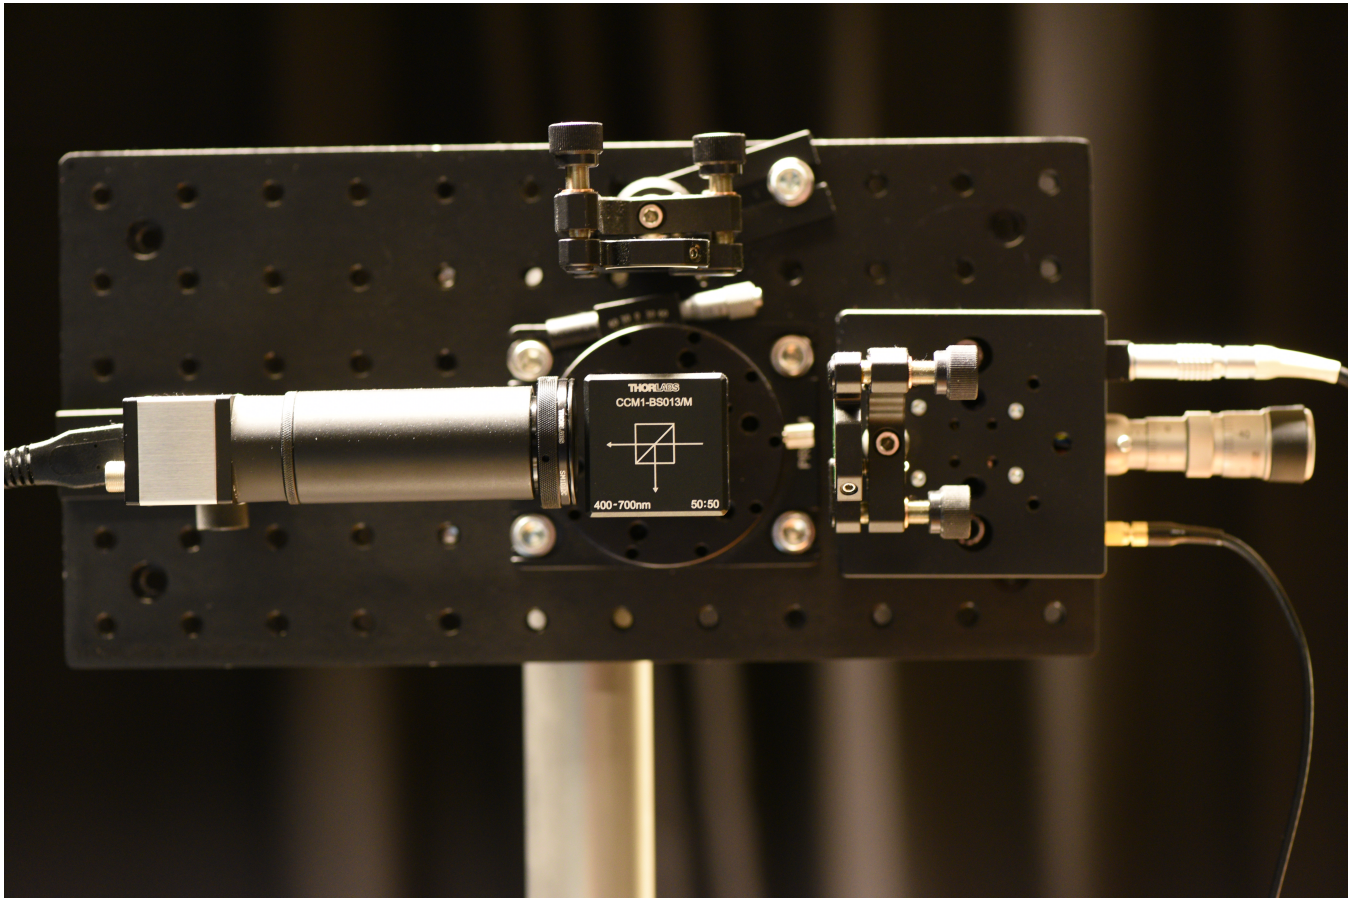

Fig. S1. Example of a digital Lippmann camera.

Movie S1. Example of a Lippmann plate under a moving light source.

Movie S2. Three-dimensional reconstruction of a plate from ptychographic X-ray tomography at cryogenic temperature.
